# Supplementary material
Source: Springer Nature journal article supplement (https://www.springermedizin.de/resource/supplementary/12985_2009_602_MOESM8_ESM.pdf/9608544)

FIGURE 1

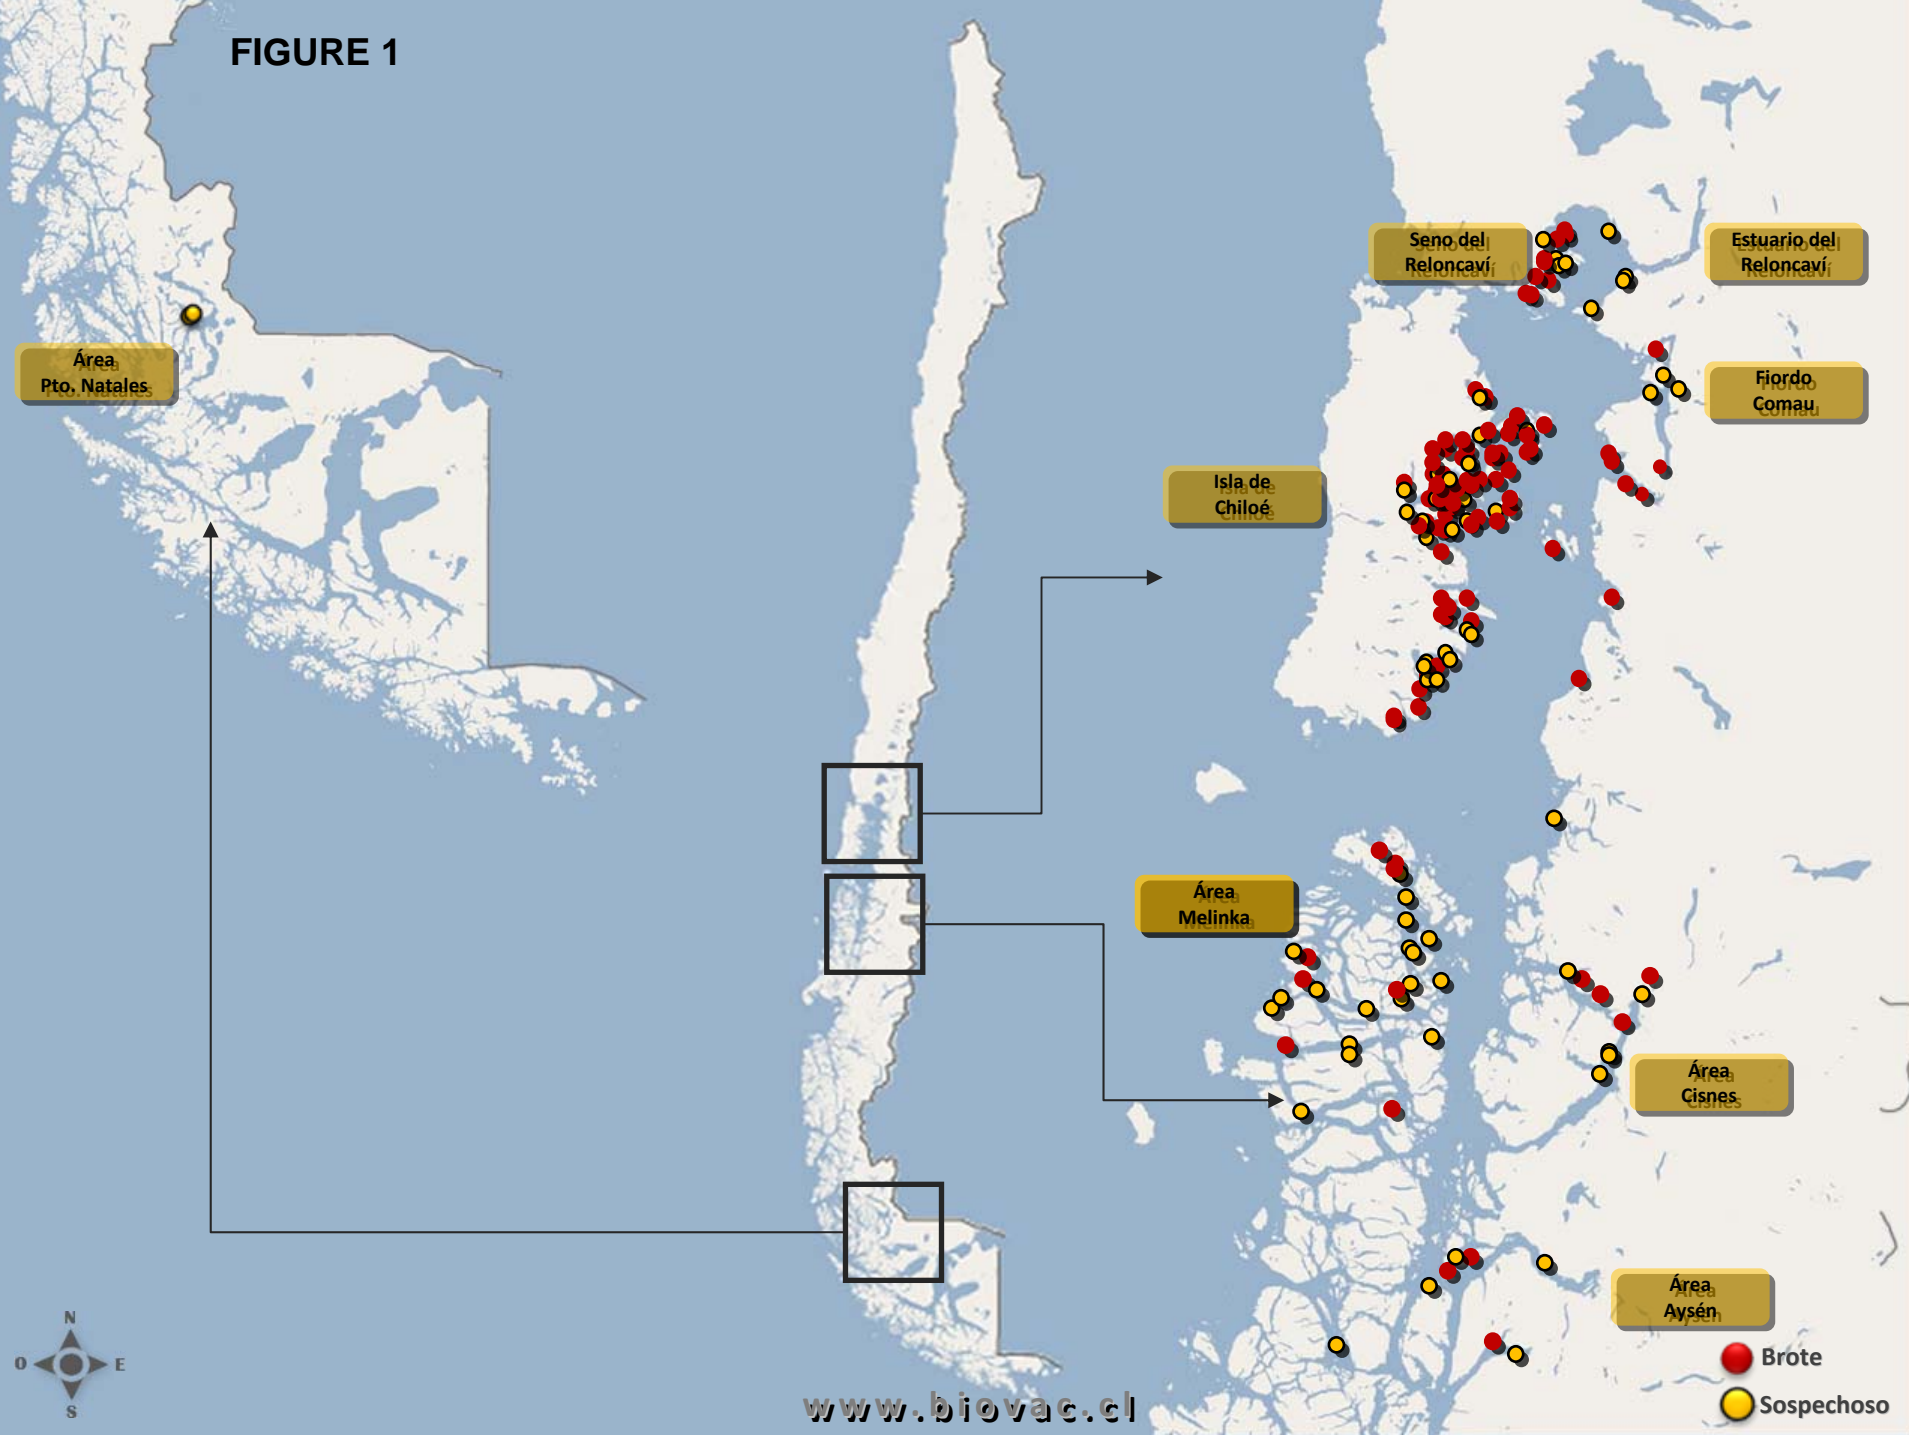

Supplement: MOESM8 [file 9608544]
